# Supplementary material for: Adjusting risk-taking to the annual cycle of long-distance migratory birds
Source: PubMed Central journal article supplement (PMC6143617; doi:10.1038/s41598-018-32252-1), 2018-09-18
Supplement: 41598_2018_32252_MOESM1_ESM.pdf [file 41598_2018_32252_MOESM1_ESM.pdf]

Supplementary material

**Adjusting risk taking to the annual cycle of long-distance migratory  
birds**

Peter Mikula, Mario Díaz, Tomáš Albrecht, Jukka Jokimäki, Marja-Liisa Kaisanlahti-  
Jokimäki, Gal Kroitero, Anders Pape Møller, Piotr Tryjanowski, Reuven Yosef, Martin  
Hromada

**Supplementary Table S1.** Results of a phylogenetic generalised least square regression (PGLS) model testing for the confounding effects of starting distance, flock size and human activity on flight initiation distance (FID) after accounting for the phylogenetic ( $\lambda = 0.415$ ;  $\chi^2_{112} = 8.29$ ,  $P = 0.004$ ) and sample size ( $V+5000W$ ) effects. Model statistics are  $F_{4, 112} = 40.17$ ,  $P < 0.001$ ,  $R^2 = 0.51$ ,  $AIC = -87.8$ . Boldface indicates statistical significance, and Pearson  $r$  values effect sizes.

| <b>Effect</b>     | <b>B</b> | <b>SE(B)</b> | <b>t</b> | <b>P</b>         | <b>r</b> |
|-------------------|----------|--------------|----------|------------------|----------|
| Starting distance | 0.50     | 0.05         | 10.39    | <b>&lt;0.001</b> | 0.609    |
| Flock size        | -0.11    | 0.03         | -3.91    | <b>&lt;0.001</b> | 0.349    |
| Human activity    | -0.02    | 0.02         | -1.31    | 0.1933           | 0.124    |

**Appendix 1.** Summary statistics. Information on bird species and populations, stage of cycle, study sites, human activity on localities, flock size, starting distance (m), mean flight initiation distance (FID) (m), standard deviation FID (m), minimum and maximum FID, sample size (N), body mass (g), clutch size (No.), egg mass (g) and survival rate (%) and PC1 and PC2 scores for the 115 sampled populations.

| Species                 | Stage    | Country | Locality    | Human activity | Flock size | Starting distance | FID  | Standard deviation FID | Min | Max | N  | Body size | Clutch size | Egg mass | Survival rate | PC1   | PC2   |
|-------------------------|----------|---------|-------------|----------------|------------|-------------------|------|------------------------|-----|-----|----|-----------|-------------|----------|---------------|-------|-------|
| Actitis_hypoleucos      | Breeding | Denmark | Brønderslev | 0              | 1          | 30.4              | 22.2 | 5.83                   | 12  | 33  | 12 | 63.0      | 4           | 12.5     | 75.0          | 6.17  | -5.45 |
| Actitis_hypoleucos      | Breeding | Finland | Rovaniemi   | 0              | 1          | 21.6              | 19.8 | 12.58                  | 7   | 40  | 5  | 63.0      | 4           | 12.5     | 75.0          | 6.17  | -5.45 |
| Actitis_hypoleucos      | Breeding | France  | Paris       | 0              | 1          | 30.0              | 20.0 | 0.00                   | 20  | 20  | 1  | 63.0      | 4           | 12.5     | 75.0          | 6.17  | -5.45 |
| Actitis_hypoleucos      | Breeding | Norway  | Dovrefjell  | 0              | 1          | 52.0              | 34.3 | 3.51                   | 31  | 38  | 3  | 63.0      | 4           | 12.5     | 75.0          | 6.17  | -5.45 |
| Actitis_hypoleucos      | Breeding | Spain   | Barcelona   | 0              | 1          | 30.0              | 16.7 | 9.87                   | 10  | 28  | 3  | 63.0      | 4           | 12.5     | 75.0          | 6.17  | -5.45 |
| Actitis_hypoleucos      | Breeding | Sweden  | Ystad       | 1              | 2          | 41.3              | 19.8 | 6.40                   | 13  | 27  | 4  | 63.0      | 4           | 12.5     | 75.0          | 6.17  | -5.45 |
| Arenaria_interpres      | Breeding | Denmark | Brønderslev | 0              | 1          | 40.0              | 20.5 | 6.36                   | 16  | 25  | 2  | 137.0     | 4           | 17.9     | 77.8          | 2.48  | -5.47 |
| Arenaria_interpres      | Breeding | Sweden  | Ystad       | 1              | 2          | 58.0              | 29.0 | 0.00                   | 29  | 29  | 1  | 137.0     | 4           | 17.9     | 77.8          | 2.48  | -5.47 |
| Burhinus_oedicephalus   | Breeding | Denmark | Brønderslev | 0              | 1          | 60.0              | 45.0 | 0.00                   | 45  | 45  | 1  | 412.5     | 2           | 42.0     | 83.2          | -6.09 | -4.72 |
| Calidris_alba           | Breeding | Denmark | Brønderslev | 0              | 1          | 30.0              | 16.9 | 3.35                   | 10  | 23  | 55 | 75.0      | 4           | 11.2     | 56.0          | 8.96  | 2.56  |
| Calidris_alpina         | Breeding | Denmark | Brønderslev | 0              | 1          | 50.0              | 22.0 | 0.00                   | 22  | 22  | 1  | 59.5      | 4           | 10.7     | 75.0          | 6.73  | -5.62 |
| Calidris_alpina         | Breeding | Sweden  | Ystad       | 1              | 6          | 53.0              | 20.3 | 1.15                   | 19  | 21  | 3  | 59.5      | 4           | 10.7     | 75.0          | 6.73  | -5.62 |
| Calidris_minuta         | Breeding | Denmark | Brønderslev | 0              | 1          | 30.0              | 19.6 | 5.24                   | 12  | 30  | 42 | 59.5      | 4           | 10.7     | 75.0          | 6.73  | -5.62 |
| Himantopus_himantopus   | Breeding | Spain   | Barcelona   | 0              | 1          | 30.0              | 22.5 | 0.58                   | 22  | 23  | 4  | 185.5     | 4           | 21.8     | 70.0          | 1.36  | -1.41 |
| Charadrius_alexandrinus | Breeding | Germany | Heligoland  | 2              | 1          | 31.0              | 10.0 | 0.00                   | 10  | 10  | 1  | 44.0      | 3           | 9.0      | 60.0          | 10.33 | 0.23  |
| Charadrius_alexandrinus | Breeding | Spain   | Barcelona   | 0              | 1          | 30.0              | 9.5  | 1.52                   | 8   | 12  | 6  | 44.0      | 3           | 9.0      | 60.0          | 10.33 | 0.23  |
| Charadrius_dubius       | Breeding | Finland | Rovaniemi   | 0              | 1          | 31.0              | 18.0 | 0.00                   | 18  | 18  | 1  | 39.5      | 4           | 7.7      | 45.0          | 12.37 | 6.57  |
| Charadrius_dubius       | Breeding | Spain   | Barcelona   | 0              | 1          | 30.0              | 9.0  | 0.00                   | 9   | 9   | 1  | 39.5      | 4           | 7.7      | 45.0          | 12.37 | 6.57  |
| Charadrius_dubius       | Breeding | Sweden  | Öland       | 2              | 1          | 44.6              | 18.1 | 3.44                   | 13  | 24  | 7  | 39.5      | 4           | 7.7      | 45.0          | 12.37 | 6.57  |
| Charadrius_dubius       | Breeding | Ukraine | Pripyat     | 0              | 1          | 30.0              | 20.0 | 2.83                   | 18  | 22  | 2  | 39.5      | 4           | 7.7      | 45.0          | 12.37 | 6.57  |
| Charadrius_hiaticula    | Breeding | Denmark | Brønderslev | 0              | 1          | 31.6              | 21.1 | 7.02                   | 10  | 40  | 37 | 60.0      | 3.5         | 11.5     | 58.0          | 9.35  | 1.49  |
| Charadrius_hiaticula    | Breeding | Finland | Rovaniemi   | 0              | 1          | 36.6              | 20.4 | 8.17                   | 10  | 30  | 5  | 60.0      | 3.5         | 11.5     | 58.0          | 9.35  | 1.49  |
| Charadrius_hiaticula    | Breeding | Germany | Heligoland  | 2              | 1          | 66.0              | 19.5 | 3.54                   | 17  | 22  | 2  | 60.0      | 3.5         | 11.5     | 58.0          | 9.35  | 1.49  |

|                      |           |           |             |   |    |       |      |       |    |    |     |       |     |      |      |        |       |
|----------------------|-----------|-----------|-------------|---|----|-------|------|-------|----|----|-----|-------|-----|------|------|--------|-------|
| Charadrius_hiaticula | Breeding  | Norway    | Runde       | 1 | 1  | 53.2  | 29.2 | 6.24  | 19 | 37 | 6   | 60.0  | 3.5 | 11.5 | 58.0 | 9.35   | 1.49  |
| Charadrius_hiaticula | Breeding  | Sweden    | Ystad       | 1 | 2  | 45.0  | 9.0  | 0.00  | 9  | 9  | 1   | 60.0  | 3.5 | 11.5 | 58.0 | 9.35   | 1.49  |
| Limosa_limosa        | Breeding  | Denmark   | Brønderslev | 0 | 1  | 50.0  | 47.0 | 0.00  | 47 | 47 | 1   | 330.0 | 4   | 39.0 | 63.1 | -5.80  | 4.26  |
| Numenius_arquata     | Breeding  | Denmark   | Brønderslev | 0 | 1  | 67.0  | 57.6 | 13.75 | 40 | 70 | 10  | 710.0 | 4   | 76.0 | 73.6 | -26.63 | 6.48  |
| Numenius_arquata     | Breeding  | Finland   | Rovaniemi   | 0 | 1  | 57.6  | 36.9 | 14.05 | 19 | 60 | 11  | 710.0 | 4   | 76.0 | 73.6 | -26.63 | 6.48  |
| Numenius_arquata     | Breeding  | Germany   | Otterndorf  | 0 | 5  | 227.0 | 44.0 | 8.66  | 39 | 54 | 3   | 710.0 | 4   | 76.0 | 73.6 | -26.63 | 6.48  |
| Numenius_phaeopus    | Breeding  | Denmark   | Brønderslev | 0 | 1  | 50.0  | 38.0 | 0.00  | 38 | 38 | 1   | 434.0 | 4   | 50.0 | 69.2 | -12.20 | 3.58  |
| Numenius_phaeopus    | Breeding  | Finland   | Rovaniemi   | 0 | 2  | 188.0 | 30.0 | 14.14 | 20 | 40 | 2   | 434.0 | 4   | 50.0 | 69.2 | -12.20 | 3.58  |
| Philomachus_pugnax   | Breeding  | Denmark   | Brønderslev | 0 | 1  | 50.0  | 20.0 | 0.00  | 20 | 20 | 1   | 162.0 | 4   | 21.0 | 52.4 | 4.71   | 5.70  |
| Pluvialis_squatarola | Breeding  | Denmark   | Brønderslev | 1 | 1  | 80.0  | 51.0 | 21.21 | 36 | 66 | 2   | 280.0 | 4   | 34.2 | 76.0 | -5.15  | -2.04 |
| Tringa_erythropus    | Breeding  | Denmark   | Brønderslev | 0 | 1  | 30.0  | 23.0 | 4.36  | 20 | 28 | 3   | 163.5 | 4   | 24.5 | 71.3 | 1.02   | -1.97 |
| Tringa_erythropus    | Breeding  | Macedonia | Prespa      | 0 | 1  | 62.0  | 31.0 | 0.00  | 31 | 31 | 1   | 163.5 | 4   | 24.5 | 71.3 | 1.02   | -1.97 |
| Tringa_glareola      | Breeding  | Denmark   | Brønderslev | 0 | 1  | 30.0  | 20.3 | 3.79  | 16 | 23 | 3   | 66.0  | 4   | 13.5 | 53.6 | 8.93   | 3.66  |
| Tringa_glareola      | Breeding  | Sweden    | Skuleskogen | 1 | 1  | 51.0  | 23.5 | 6.36  | 19 | 28 | 2   | 66.0  | 4   | 13.5 | 53.6 | 8.93   | 3.66  |
| Tringa_nebularia     | Breeding  | Denmark   | Brønderslev | 1 | 1  | 41.5  | 37.8 | 13.57 | 20 | 53 | 4   | 212.5 | 4   | 30.5 | 82.0 | -3.34  | -5.52 |
| Tringa_nebularia     | Breeding  | Finland   | Rovaniemi   | 0 | 1  | 55.0  | 46.5 | 53.03 | 9  | 84 | 2   | 212.5 | 4   | 30.5 | 82.0 | -3.34  | -5.52 |
| Tringa_nebularia     | Breeding  | Norway    | Oslo        | 0 | 1  | 30.0  | 30.0 | 0.00  | 30 | 30 | 1   | 212.5 | 4   | 30.5 | 82.0 | -3.34  | -5.52 |
| Tringa_nebularia     | Breeding  | Norway    | Runde       | 1 | 2  | 40.0  | 22.0 | 0.00  | 22 | 22 | 1   | 212.5 | 4   | 30.5 | 82.0 | -3.34  | -5.52 |
| Tringa_ochropus      | Breeding  | Denmark   | Brønderslev | 0 | 1  | 65.0  | 38.0 | 9.90  | 31 | 45 | 2   | 86.0  | 4   | 30.5 | 84.0 | -0.42  | -7.64 |
| Tringa_ochropus      | Breeding  | Finland   | Rovaniemi   | 0 | 1  | 12.0  | 10.0 | 0.00  | 10 | 10 | 1   | 86.0  | 4   | 30.5 | 84.0 | -0.42  | -7.64 |
| Tringa_ochropus      | Breeding  | Norway    | Bømlo       | 1 | 2  | 29.0  | 16.0 | 0.00  | 16 | 16 | 1   | 86.0  | 4   | 30.5 | 84.0 | -0.42  | -7.64 |
| Tringa_ochropus      | Breeding  | Norway    | Stord       | 0 | 3  | 85.0  | 45.7 | 8.50  | 37 | 54 | 3   | 86.0  | 4   | 30.5 | 84.0 | -0.42  | -7.64 |
| Tringa_totanus       | Breeding  | Denmark   | Brønderslev | 0 | 1  | 39.6  | 26.5 | 10.29 | 12 | 40 | 13  | 120.0 | 4   | 22.3 | 71.3 | 2.70   | -2.58 |
| Tringa_totanus       | Breeding  | Germany   | Otterndorf  | 0 | 1  | 68.5  | 31.5 | 4.95  | 28 | 35 | 2   | 120.0 | 4   | 22.3 | 71.3 | 2.70   | -2.58 |
| Tringa_totanus       | Breeding  | Norway    | Runde       | 1 | 1  | 107.1 | 40.3 | 5.15  | 33 | 48 | 7   | 120.0 | 4   | 22.3 | 71.3 | 2.70   | -2.58 |
| Tringa_totanus       | Breeding  | Spain     | Barcelona   | 0 | 1  | 30.0  | 18.0 | 0.00  | 18 | 18 | 1   | 120.0 | 4   | 22.3 | 71.3 | -0.42  | -7.64 |
| Tringa_totanus       | Breeding  | Sweden    | Ystad       | 1 | 2  | 47.0  | 23.3 | 2.52  | 21 | 26 | 3   | 120.0 | 4   | 22.3 | 71.3 | 2.70   | -2.58 |
| Calidris_alpina      | Migration | Israel    | Eilat       | 0 | 3  | 49.1  | 19.8 | 7.14  | 4  | 30 | 56  | 59.5  | 4   | 10.7 | 75.0 | 6.73   | -5.62 |
| Calidris_minuta      | Migration | Israel    | Eilat       | 0 | 10 | 28.1  | 13.8 | 6.06  | 4  | 39 | 512 | 59.5  | 4   | 10.7 | 75.0 | 6.73   | -5.62 |

|                         |           |        |                 |   |    |       |      |       |    |    |     |       |     |      |      |        |       |
|-------------------------|-----------|--------|-----------------|---|----|-------|------|-------|----|----|-----|-------|-----|------|------|--------|-------|
| Himantopus_himantopus   | Migration | Israel | Eilat           | 0 | 5  | 34.4  | 15.7 | 9.05  | 2  | 70 | 519 | 185.5 | 4   | 21.8 | 70.0 | 1.36   | -1.41 |
| Charadrius_alexandrinus | Migration | Israel | Eilat           | 0 | 2  | 13.5  | 8.3  | 2.94  | 6  | 12 | 6   | 44.0  | 3   | 9.0  | 60.0 | 10.33  | 0.23  |
| Charadrius_dubius       | Migration | Israel | Eilat           | 0 | 6  | 24.1  | 8.7  | 5.98  | 3  | 25 | 10  | 39.5  | 4   | 7.7  | 45.0 | 10.33  | 0.23  |
| Charadrius_hiaticula    | Migration | Israel | Eilat           | 0 | 18 | 35.0  | 14.5 | 4.51  | 8  | 18 | 4   | 60.0  | 3.5 | 11.5 | 58.0 | 9.35   | 1.49  |
| Numenius_arquata        | Migration | Israel | Eilat           | 0 | 2  | 27.6  | 13.1 | 6.96  | 5  | 22 | 7   | 710.0 | 4   | 76.0 | 73.6 | -26.63 | 6.48  |
| Tringa_erythropus       | Migration | Israel | Eilat           | 0 | 2  | 25.2  | 13.2 | 3.43  | 8  | 17 | 6   | 163.5 | 4   | 24.5 | 71.3 | 1.02   | -1.97 |
| Tringa_glareola         | Migration | Israel | Eilat           | 0 | 5  | 39.5  | 18.3 | 11.21 | 4  | 40 | 13  | 66.0  | 4   | 13.5 | 53.6 | 8.93   | 3.66  |
| Tringa_totanus          | Migration | Israel | Eilat           | 0 | 3  | 33.7  | 18.0 | 9.54  | 2  | 40 | 310 | 120.0 | 4   | 22.3 | 71.3 | 2.70   | -2.58 |
| Actitis_hypoleucos      | Wintering | Kenya  | El Molo         | 2 | 1  | 67.7  | 15.2 | 3.05  | 11 | 21 | 10  | 63.0  | 4   | 12.5 | 75.0 | 6.17   | -5.45 |
| Actitis_hypoleucos      | Wintering | Kenya  | Koobi Fora      | 0 | 1  | 61.7  | 18.3 | 3.52  | 14 | 26 | 15  | 63.0  | 4   | 12.5 | 75.0 | 6.17   | -5.45 |
| Actitis_hypoleucos      | Wintering | Kenya  | Loiyangalani    | 0 | 2  | 55.9  | 13.4 | 4.79  | 5  | 22 | 19  | 63.0  | 4   | 12.5 | 75.0 | 6.17   | -5.45 |
| Actitis_hypoleucos      | Wintering | Kenya  | Naivasha        | 1 | 1  | 49.2  | 18.0 | 5.43  | 11 | 24 | 5   | 63.0  | 4   | 12.5 | 75.0 | 6.17   | -5.45 |
| Actitis_hypoleucos      | Wintering | Kenya  | Thomson's Falls | 2 | 1  | 33.0  | 12.0 | 0.00  | 12 | 12 | 1   | 63.0  | 4   | 12.5 | 75.0 | 6.17   | -5.45 |
| Actitis_hypoleucos      | Wintering | Kenya  | Watamu          | 2 | 3  | 63.3  | 15.3 | 6.65  | 6  | 21 | 4   | 63.0  | 4   | 12.5 | 75.0 | 6.17   | -5.45 |
| Actitis_hypoleucos      | Wintering | Uganda | Mburo           | 0 | 1  | 41.0  | 12.0 | 0.00  | 12 | 12 | 1   | 63.0  | 4   | 12.5 | 75.0 | 6.17   | -5.45 |
| Arenaria_interpres      | Wintering | Kenya  | Mida Creek      | 0 | 2  | 183.0 | 39.0 | 0.00  | 39 | 39 | 1   | 137.0 | 4   | 17.9 | 77.8 | 2.48   | -5.47 |
| Burhinus_oedicephalus   | Wintering | Kenya  | Koobi Fora      | 0 | 2  | 51.0  | 22.0 | 0.00  | 22 | 22 | 1   | 412.5 | 2   | 42.0 | 83.2 | -6.09  | -4.72 |
| Calidris_alba           | Wintering | Kenya  | Loiyangalani    | 0 | 2  | 43.5  | 14.0 | 1.41  | 13 | 15 | 2   | 75.0  | 4   | 11.2 | 56.0 | 8.96   | 2.56  |
| Calidris_alba           | Wintering | Kenya  | Watamu          | 2 | 4  | 102.5 | 26.5 | 4.95  | 23 | 30 | 2   | 75.0  | 4   | 11.2 | 56.0 | 8.96   | 2.56  |
| Calidris_minuta         | Wintering | Kenya  | El Molo         | 2 | 38 | 72.6  | 23.0 | 7.16  | 14 | 41 | 11  | 59.5  | 4   | 10.7 | 75.0 | 6.73   | -5.62 |
| Calidris_minuta         | Wintering | Kenya  | Koobi Fora      | 0 | 2  | 66.2  | 18.2 | 4.63  | 11 | 34 | 29  | 59.5  | 4   | 10.7 | 75.0 | 6.73   | -5.62 |
| Calidris_minuta         | Wintering | Kenya  | Loiyangalani    | 0 | 9  | 65.7  | 15.0 | 2.65  | 12 | 17 | 3   | 59.5  | 4   | 10.7 | 75.0 | 6.73   | -5.62 |
| Calidris_minuta         | Wintering | Kenya  | Mida Creek      | 0 | 37 | 147.5 | 43.0 | 6.63  | 32 | 53 | 8   | 59.5  | 4   | 10.7 | 75.0 | 6.73   | -5.62 |
| Calidris_minuta         | Wintering | Kenya  | Naivasha        | 1 | 1  | 61.3  | 28.0 | 5.00  | 23 | 33 | 3   | 59.5  | 4   | 10.7 | 75.0 | 6.73   | -5.62 |
| Calidris_minuta         | Wintering | Kenya  | Olbolosat       | 1 | 1  | 55.9  | 27.7 | 7.45  | 18 | 44 | 9   | 59.5  | 4   | 10.7 | 75.0 | 6.73   | -5.62 |
| Calidris_minuta         | Wintering | Kenya  | Watamu          | 2 | 12 | 137.0 | 25.5 | 12.02 | 17 | 34 | 2   | 59.5  | 4   | 10.7 | 75.0 | 6.73   | -5.62 |
| Himantopus_himantopus   | Wintering | Kenya  | El Molo         | 2 | 1  | 99.0  | 26.3 | 2.31  | 25 | 29 | 3   | 185.5 | 4   | 21.8 | 70.0 | 1.36   | -1.41 |
| Himantopus_himantopus   | Wintering | Kenya  | Koobi Fora      | 0 | 3  | 79.7  | 32.7 | 9.64  | 20 | 53 | 15  | 185.5 | 4   | 21.8 | 70.0 | 1.36   | -1.41 |
| Himantopus_himantopus   | Wintering | Kenya  | Naivasha        | 1 | 1  | 66.0  | 27.0 | 3.00  | 24 | 30 | 3   | 185.5 | 4   | 21.8 | 70.0 | 1.36   | -1.41 |

|                         |           |        |              |   |    |       |      |       |    |    |    |       |     |      |      |        |       |
|-------------------------|-----------|--------|--------------|---|----|-------|------|-------|----|----|----|-------|-----|------|------|--------|-------|
| Charadrius_alexandrinus | Wintering | Kenya  | Mida Creek   | 0 | 1  | 166.0 | 22.0 | 0.00  | 22 | 22 | 1  | 44.0  | 3   | 9.0  | 60.0 | 10.33  | 0.23  |
| Charadrius_dubius       | Wintering | Kenya  | El Molo      | 2 | 1  | 32.0  | 12.0 | 0.00  | 12 | 12 | 1  | 39.5  | 4   | 7.7  | 45.0 | 12.37  | 6.57  |
| Charadrius_dubius       | Wintering | Kenya  | Loiyangalani | 0 | 1  | 77.5  | 12.0 | 1.41  | 11 | 13 | 2  | 39.5  | 4   | 7.7  | 45.0 | 12.37  | 6.57  |
| Charadrius_dubius       | Wintering | Kenya  | Watamu       | 2 | 1  | 65.8  | 17.8 | 2.86  | 14 | 22 | 6  | 39.5  | 4   | 7.7  | 45.0 | 12.37  | 6.57  |
| Charadrius_hiaticula    | Wintering | Kenya  | El Molo      | 2 | 2  | 45.4  | 15.9 | 4.20  | 10 | 25 | 10 | 60.0  | 3.5 | 11.5 | 58.0 | 9.35   | 1.49  |
| Charadrius_hiaticula    | Wintering | Kenya  | Koobi Fora   | 0 | 2  | 55.8  | 16.9 | 3.92  | 11 | 24 | 27 | 60.0  | 3.5 | 11.5 | 58.0 | 9.35   | 1.49  |
| Charadrius_hiaticula    | Wintering | Kenya  | Loiyangalani | 0 | 4  | 60.1  | 15.7 | 3.63  | 9  | 22 | 19 | 60.0  | 3.5 | 11.5 | 58.0 | 9.35   | 1.49  |
| Charadrius_hiaticula    | Wintering | Kenya  | Mida Creek   | 0 | 21 | 107.7 | 24.0 | 10.30 | 13 | 40 | 6  | 60.0  | 3.5 | 11.5 | 58.0 | 9.35   | 1.49  |
| Charadrius_hiaticula    | Wintering | Kenya  | Naivasha     | 1 | 1  | 59.8  | 30.5 | 4.43  | 26 | 36 | 4  | 60.0  | 3.5 | 11.5 | 58.0 | 9.35   | 1.49  |
| Charadrius_hiaticula    | Wintering | Kenya  | Olbolosat    | 1 | 1  | 69.7  | 25.3 | 1.53  | 24 | 27 | 3  | 60.0  | 3.5 | 11.5 | 58.0 | 9.35   | 1.49  |
| Charadrius_hiaticula    | Wintering | Kenya  | Watamu       | 2 | 4  | 74.1  | 16.1 | 6.31  | 10 | 29 | 14 | 60.0  | 3.5 | 11.5 | 58.0 | 9.35   | 1.49  |
| Limosa_limosa           | Wintering | Kenya  | Koobi Fora   | 0 | 4  | 135.0 | 34.0 | 0.00  | 34 | 34 | 1  | 330.0 | 4   | 39.0 | 63.1 | -5.80  | 4.26  |
| Numenius_arquata        | Wintering | Kenya  | Mida Creek   | 0 | 1  | 251.0 | 50.0 | 5.66  | 46 | 54 | 2  | 710.0 | 4   | 76.0 | 73.6 | -26.63 | 6.48  |
| Numenius_phaeopus       | Wintering | Kenya  | Watamu       | 2 | 4  | 109.0 | 40.5 | 37.48 | 14 | 67 | 2  | 434.0 | 4   | 50.0 | 69.2 | -26.63 | 6.48  |
| Philomachus_pugnax      | Wintering | Kenya  | Koobi Fora   | 0 | 1  | 70.0  | 35.0 | 0.00  | 35 | 35 | 1  | 162.0 | 4   | 21.0 | 52.4 | 4.71   | 5.70  |
| Philomachus_pugnax      | Wintering | Kenya  | Mida Creek   | 0 | 2  | 135.0 | 44.0 | 0.00  | 44 | 44 | 1  | 162.0 | 4   | 21.0 | 52.4 | 4.71   | 5.70  |
| Philomachus_pugnax      | Wintering | Kenya  | Naivasha     | 1 | 1  | 64.1  | 26.6 | 5.16  | 20 | 36 | 7  | 162.0 | 4   | 21.0 | 52.4 | 4.71   | 5.70  |
| Philomachus_pugnax      | Wintering | Kenya  | Olbolosat    | 1 | 1  | 70.0  | 33.4 | 6.73  | 24 | 41 | 9  | 162.0 | 4   | 21.0 | 52.4 | 4.71   | 5.70  |
| Pluvialis_squatarola    | Wintering | Kenya  | Mida Creek   | 0 | 4  | 143.3 | 41.1 | 7.61  | 32 | 53 | 8  | 280.0 | 4   | 34.2 | 76.0 | -5.15  | -2.04 |
| Pluvialis_squatarola    | Wintering | Kenya  | Watamu       | 2 | 4  | 159.0 | 37.0 | 0.00  | 37 | 37 | 1  | 280.0 | 4   | 34.2 | 76.0 | -5.15  | -2.04 |
| Tringa_glareola         | Wintering | Kenya  | Koobi Fora   | 0 | 1  | 61.3  | 24.7 | 6.66  | 19 | 32 | 3  | 66.0  | 4   | 13.5 | 53.6 | 8.93   | 3.66  |
| Tringa_glareola         | Wintering | Kenya  | Mida Creek   | 0 | 5  | 236.0 | 37.0 | 6.98  | 31 | 46 | 4  | 66.0  | 4   | 13.5 | 53.6 | 8.93   | 3.66  |
| Tringa_glareola         | Wintering | Kenya  | Olbolosat    | 1 | 2  | 69.3  | 26.0 | 2.00  | 24 | 28 | 3  | 66.0  | 4   | 13.5 | 53.6 | 8.93   | 3.66  |
| Tringa_glareola         | Wintering | Uganda | Mburo        | 0 | 1  | 39.0  | 20.5 | 3.54  | 18 | 23 | 2  | 66.0  | 4   | 13.5 | 53.6 | 8.93   | 3.66  |
| Tringa_nebularia        | Wintering | Kenya  | El Molo      | 2 | 1  | 95.1  | 34.0 | 9.90  | 21 | 45 | 7  | 212.5 | 4   | 30.5 | 82.0 | -3.34  | -5.52 |
| Tringa_nebularia        | Wintering | Kenya  | Koobi Fora   | 0 | 1  | 175.6 | 23.4 | 5.27  | 15 | 29 | 10 | 212.5 | 4   | 30.5 | 82.0 | -3.34  | -5.52 |
| Tringa_nebularia        | Wintering | Kenya  | Loiyangalani | 0 | 1  | 71.0  | 21.0 | 4.98  | 16 | 27 | 6  | 212.5 | 4   | 30.5 | 82.0 | -3.34  | -5.52 |
| Tringa_nebularia        | Wintering | Kenya  | Mida Creek   | 0 | 11 | 135.2 | 38.2 | 5.31  | 33 | 51 | 14 | 212.5 | 4   | 30.5 | 82.0 | -3.34  | -5.52 |
| Tringa_nebularia        | Wintering | Kenya  | Watamu       | 2 | 2  | 80.8  | 29.4 | 7.11  | 18 | 37 | 9  | 212.5 | 4   | 30.5 | 82.0 | -3.34  | -5.52 |

|                 |           |        |              |   |   |       |      |      |    |    |   |       |   |      |      |       |       |
|-----------------|-----------|--------|--------------|---|---|-------|------|------|----|----|---|-------|---|------|------|-------|-------|
| Tringa_ochropus | Wintering | Kenya  | Loiyangalani | 0 | 2 | 61.0  | 17.0 | 2.83 | 15 | 19 | 2 | 86.0  | 4 | 30.5 | 84.0 | -0.42 | -7.64 |
| Tringa_ochropus | Wintering | Kenya  | Mida Creek   | 0 | 5 | 249.0 | 36.5 | 6.86 | 31 | 46 | 4 | 86.0  | 4 | 30.5 | 84.0 | -0.42 | -7.64 |
| Tringa_ochropus | Wintering | Uganda | Tororo       | 0 | 1 | 45.0  | 8.0  | 0.00 | 8  | 8  | 1 | 86.0  | 4 | 30.5 | 84.0 | -0.42 | -7.64 |
| Tringa_totanus  | Wintering | Kenya  | Mida Creek   | 0 | 3 | 128.0 | 38.7 | 2.52 | 36 | 41 | 3 | 120.0 | 4 | 22.3 | 71.3 | 2.70  | -2.58 |
| Tringa_totanus  | Wintering | Kenya  | Naiivasha    | 1 | 2 | 60.0  | 24.0 | 2.83 | 22 | 26 | 2 | 120.0 | 4 | 22.3 | 71.3 | 2.70  | -2.58 |

---

**Appendix 2.** R scripts used to test for differences in mean flight initiation distance (FID) among stages of the annual cycle (breeding, migration, and wintering grounds) after controlling for phylogeny ( $\lambda$ ) and sample sizes ( $1/N_i$  values arranged in a Wvector W). Model 1 tested for the effects of the confounding covariates human activity (HUMAN), starting distance (LOGSD) and flock size (LOGFLOCK) on FID. Model 2 tested for differences in FID among stages (STAGE) after accounting for effects of confounding covariates, and model 3 for effects of the life-history traits body mass, clutch mass (clutch size x egg mass) and survival rate after its combination into two Principal Components (PC1 and PC2) by means of phylogenetic principal component analyses. Model 3 tested for both pure effects of covariates and for their variation among stages of the annual cycle (STAGE\*covariate terms).

```
library(MASS)
library(mvtnorm)
library(ape)
source("C:/R/pglm3.3.r")
setwd("C:/R/")
fa<-read.tree("PHYLOGENY.txt")
V<-vcv.phylo(fa)
data<-read.table("DATA",header=T)
attach(data)
fix(data)

mod1<-pglmEstLambda(LOGFID~HUMAN+LOGSD+LOGFLOCK,data=data, V)
summary(mod1)

mod2<-pglmEstLambda(LOGFID~LOGSD+LOGFLOCK+STAGE,data=data, V)
summary(mod2)

mod3<-
pglmEstLambda(LOGFID~LOGSD+LOGFLOCK+PC1+PC2+STAGE+PC1*STAGE+
PC2*STAGE,data=data, V)
summary(mod3)
```



```

Wvector<-c(1/N1,
1/N2,
.....,
1/Nn)
W <- diag(Wvector)
rownames(W) <- rownames(V)
mod10<-
pglm(LOGFID~LOGSD+LOGFLOCK+PC1+PC2+STAGE+PC1*STAGE+PC2*STA
GE, data = data, V + 1*W, lambda = Lambda)
summary(mod10)

```

References for R packages:

- Genz A., Bretz F., Miwa T., Mi X., Leisch F., Scheipl F. & Hothorn T. mvtnorm: Multivariate Normal and t Distributions. R package version 1.0-6. URL: <http://CRAN.R-project.org/package=mvtnorm> (2017).
- Paradis E., Claude J. & Strimmer K. APE: analyses of phylogenetics and evolution in R language. *Bioinformatics* **20**, 289–290 (2004).
- Revell L. J. Size-correction and principal components for interspecific comparative studies. *Evolution* **63**, 3258–3268 (2009).
- Venables W. N. & Ripley B. D. *Modern Applied Statistics with S. Fourth Edition.* (Springer, 2002).

**Appendix 3.** Phylogenetic relationships among the analysed species of waders.

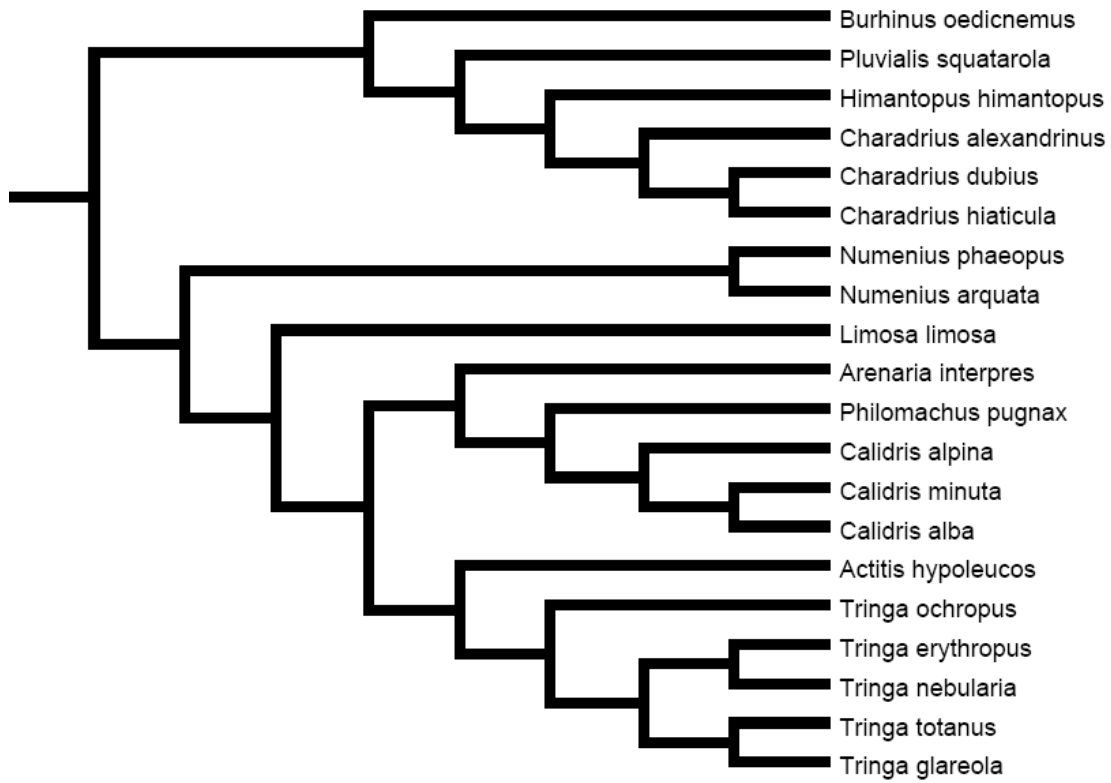

((Burhinus\_oedicnemus:57.69839803,(Pluvialis\_squatarola:45.9961262,(Himantopus\_himantopus:43.135072480000005,(Charadrius\_alexandrinus:35.75475004000002,(Charadrius\_dubius:23.895144910000013,Charadrius\_hiaticula:23.895144970000004):5.9298026849999985):3.6901609600000014):1.4305271):5.85113588):5.299793220000001,((Numenius\_phaeopus:14.527597580000002,Numenius\_arquata:14.527597460000003):12.266474699999998,(Limosa\_limosa:35.06059179,((Arenaria\_interpres:26.755496679999993,(Philomachus\_pugnax:17.557721979999993,(Calidris\_alpina:13.23101037,(Calidris\_minuta:7.1249112100000005,Calidris\_alba:7.12021641):6.17251908080808):4.32201692):4.598887324999998):5.684327790000001,(Actitis\_hypoleucos:27.264562990000005,(Tringa\_ochropus:19.452379480000001,((Tringa\_erythropus:10.891019639999998,Tringa\_nebularia:10.8910197):1.6884457549999996,(Tringa\_totanus:7.644740860000002,Tringa\_glareola:7.644740810000003):6.623170419999999):2.592234175):7.812183500000002):2.587630715000001):1.3103837300000007):3.9999550500000014):23.93764437);
